# Supplementary material
Source: publisher figshare collection journal article supplement (https://wiley.figshare.com/articles/dataset/_/6005114)
Supplement: Supplementary file [file 1]

Wild Type

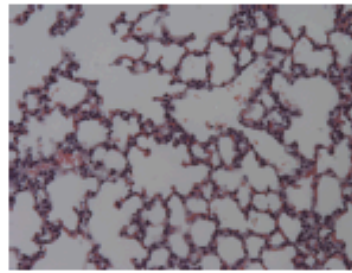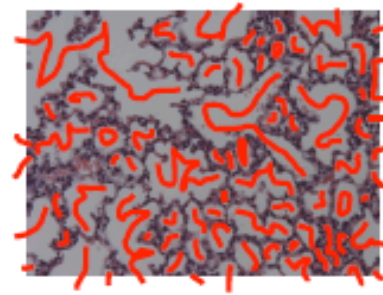

MΦ-Depleted

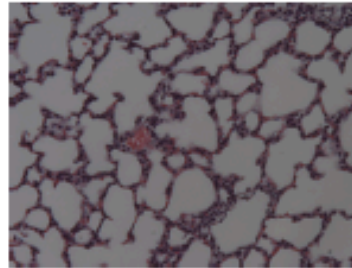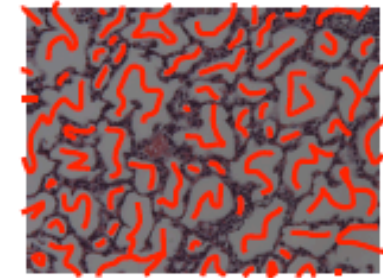

*Scnn1b*-Tg

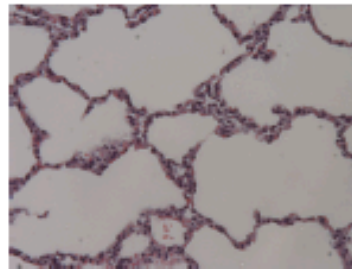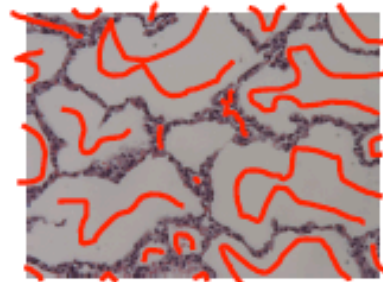

MΦ-Depleted *Scnn1b*-Tg

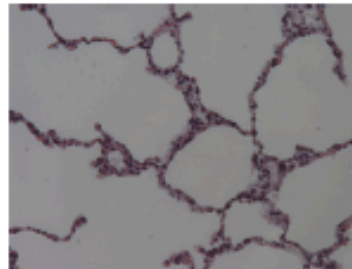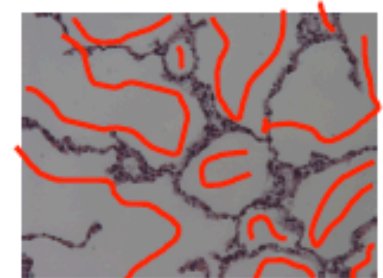

Raw Images

Analyzed Images
