# Supplementary material
Source: publisher figshare collection journal article supplement (https://wiley.figshare.com/articles/dataset/_/6005114)
Supplement: Supplementary file [file 1]

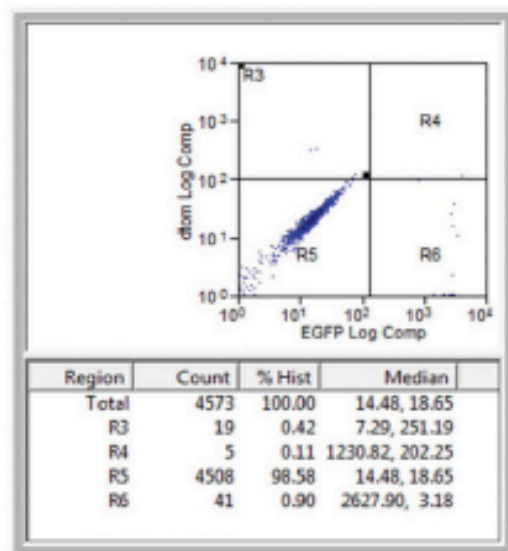

LysM-Cre  
mTOM/mEGFP

+

---

-

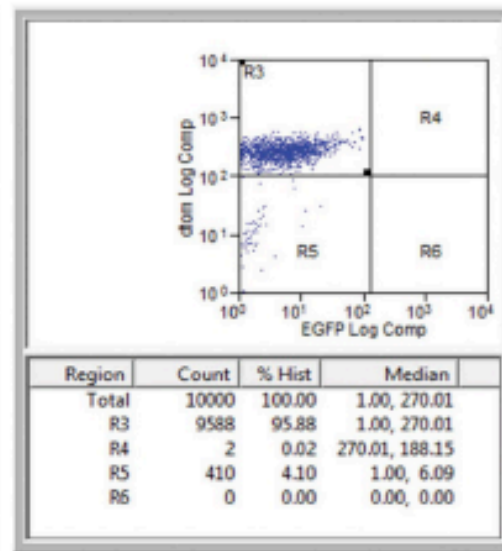

-

---

+

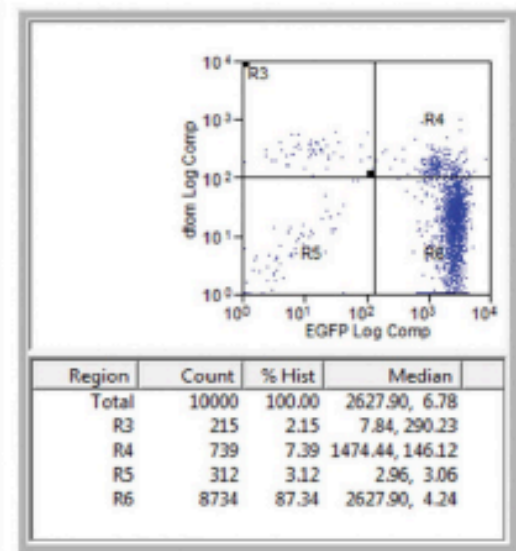

+

---

+

Saini *et. al.*, Supplemental Figure 2
